# Supplementary material for: Novel therapeutic strategy for cervical cancer harboring FGFR3-TACC3 fusions
Source: PubMed Central journal article supplement (PMC5833787; doi:10.1038/s41389-017-0018-2), 2018-01-23
Supplement: 41389_2017_18_MOESM1_ESM.pdf [file 41389_2017_18_MOESM1_ESM.pdf]

## **Supplementary Information**

**Novel therapeutic strategy for cervical cancer harboring *FGFR3-TACC3* fusions**

**a**

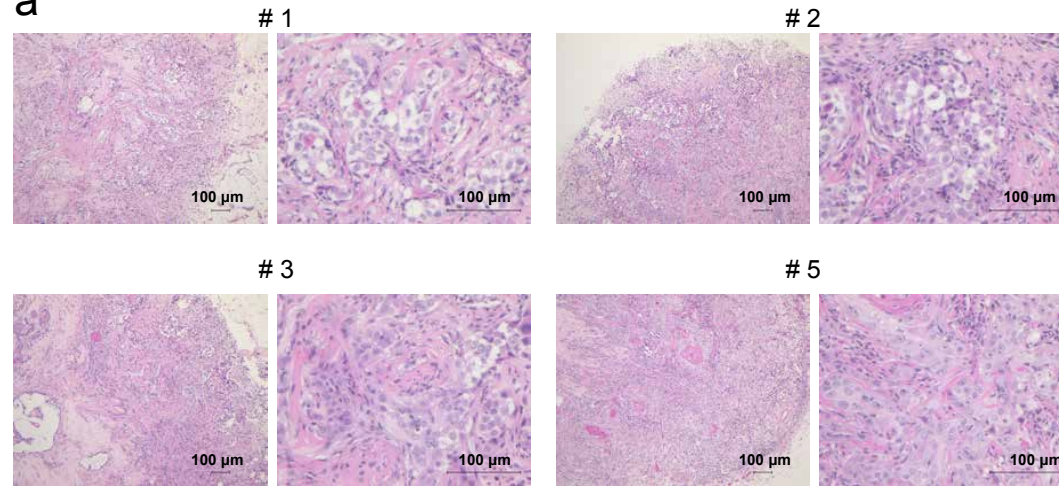

**b**

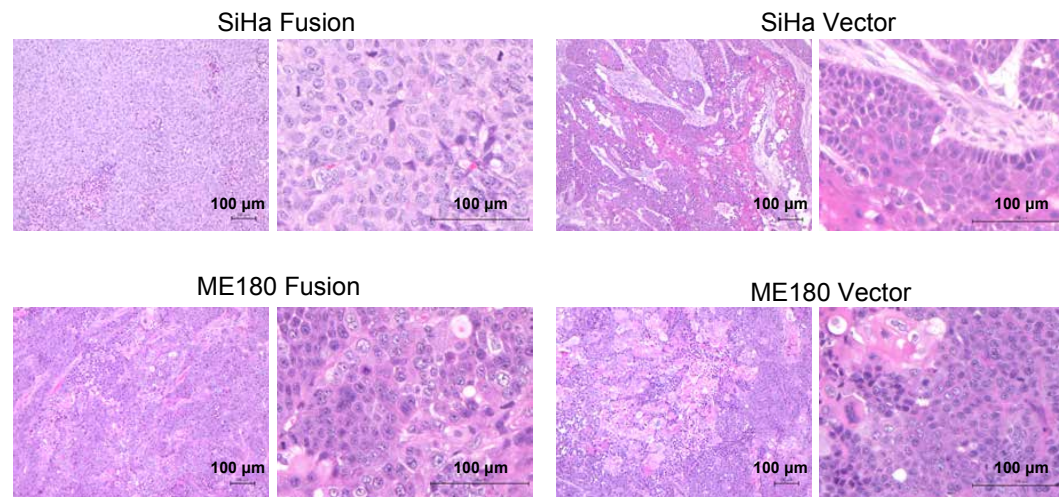

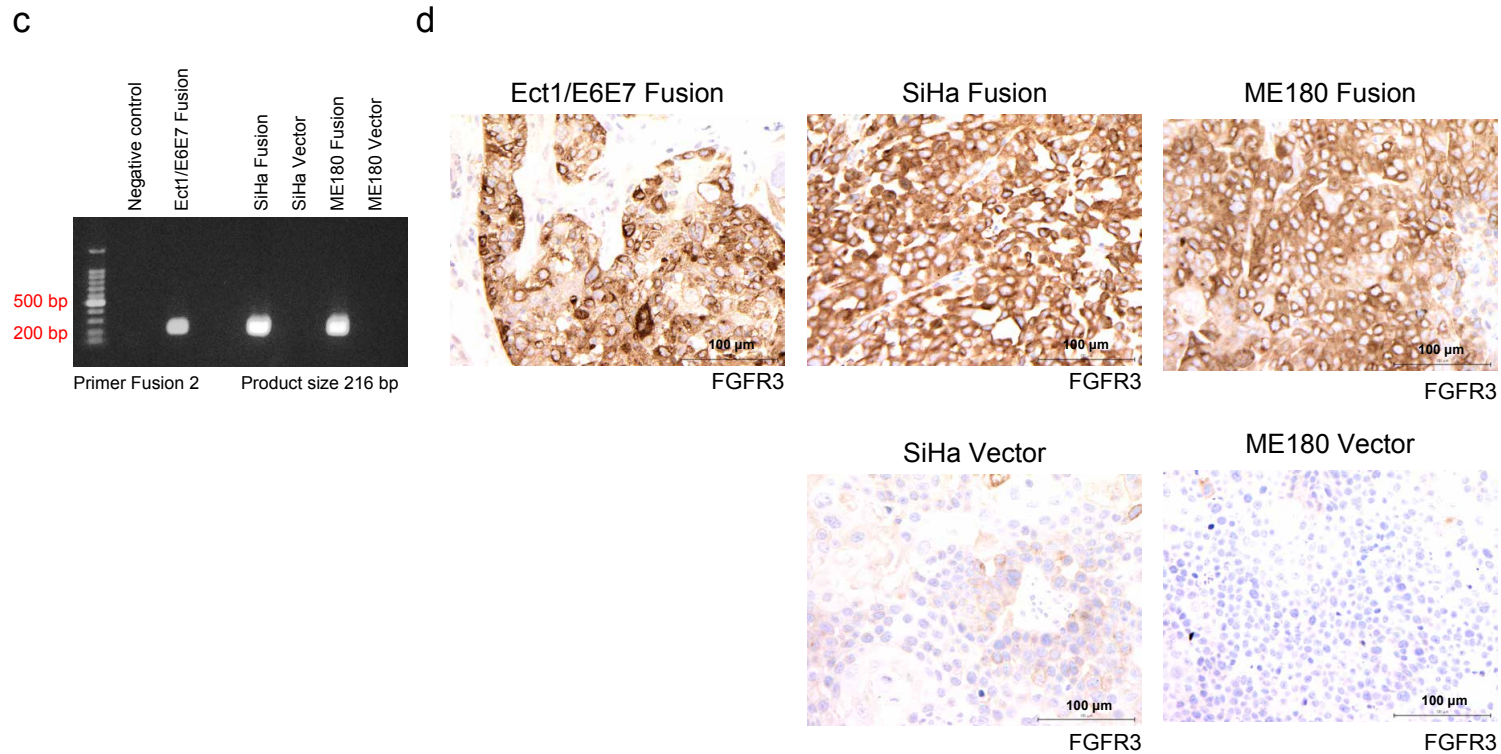

### Supplementary Figure 1.

**Histological findings of xenograft tumors derived from *FGFR3-TACC3* fusion-transfected Ect1/E6E7, SiHa and ME180.** (a) Representative images of H&E stained xenograft tumors derived from *FGFR3-TACC3* fusion-transfected Ect1/E6E7 (100X and 400X magnification). All tumors were histologically diagnosed as squamous cell carcinoma. (b) Representative images of H&E stained xenograft tumors derived from *FGFR3-TACC3* fusion-transfected and control vector-transfected SiHa and ME180 cell lines (100X and 400X magnification). Tumors derived from *FGFR3-TACC3* fusion-transfected SiHa or ME180 cells demonstrated obvious reduction of keratinizing area compared to the controls. (c) Confirmation of the *FGFR3-TACC3* fusion transcript in xenograft tumors based on RT-PCR. (d) Immunohistochemical staining for xenograft tumors showed FGFR3 overexpression in xenograft tumors derived from *FGFR3-TACC3* fusion-transfected Ect1/E6E7, SiHa, and ME180 cell lines (200X magnification; scale bar, 100 μm).

### Ect1/E6E7

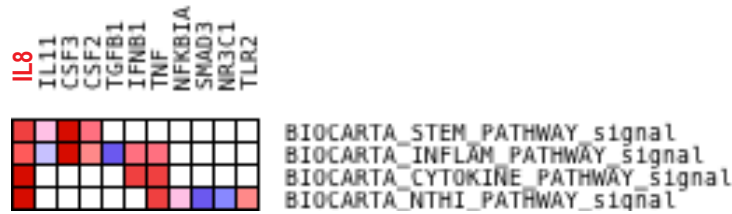

### SiHa

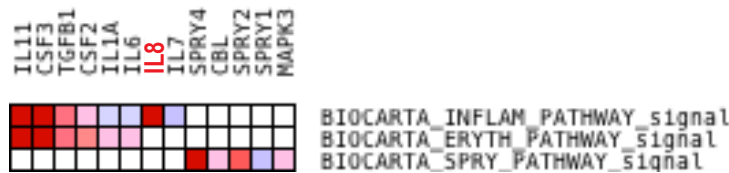

### ME180

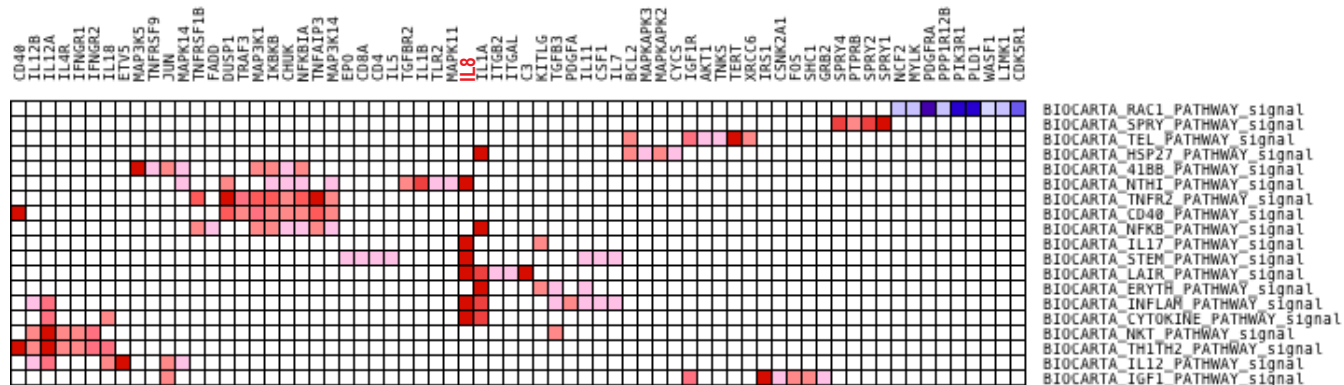

### Supplementary Figure 2.

Leading edge analysis of significant GSEA gene sets in *FGFR3-TACC3* fusion-transfected cell lines (Ect1/E6E7, SiHa and ME180).

Leading edge analysis demonstrated that overexpression of *IL-8* was common among *FGFR3-TACC3* fusion-transfected Ect1/E6E7, SiHa, and ME180 cell lines.

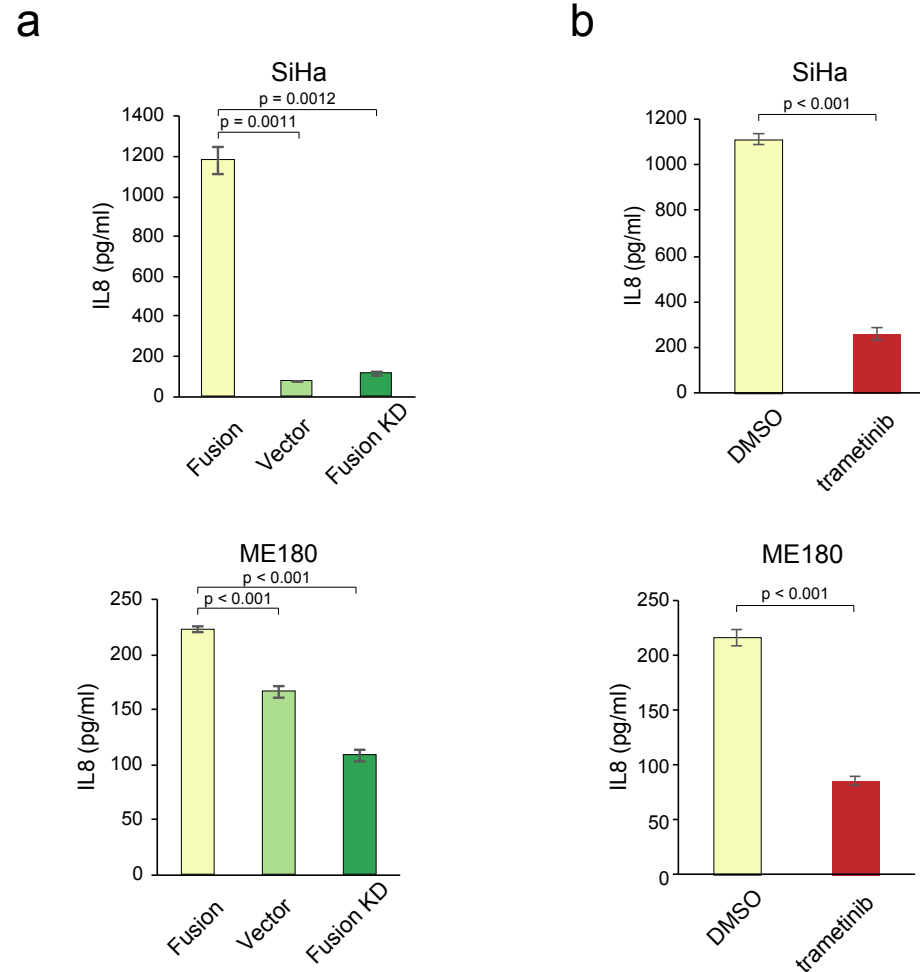

**Supplementary Figure 3.**

**Expression of the *FGFR3-TACC3* fusion gene induces IL-8 secretion via MAPK pathway activation.**

**(a)** Secretion of IL-8 was assessed by ELISA assay 24 hours after cell seeding.

**(b)** Secretion of IL-8 was assessed after treatment with trametinib (0.1  $\mu\text{g/ml}$ ) for 48 hours (\*\* denotes  $p < 0.01$ , unpaired t-test)

a

*FGFR3-TACC3* fusion kinase dead expressed cell lines compared with control

Number of enriched pathway (q value  $(-\log_2) > 2$ )

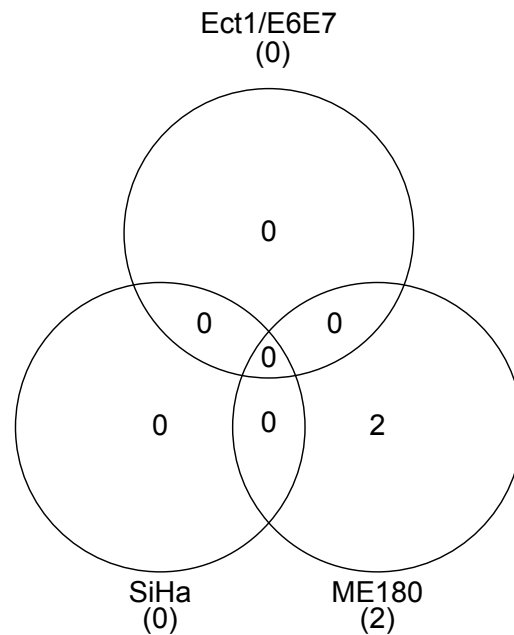

b

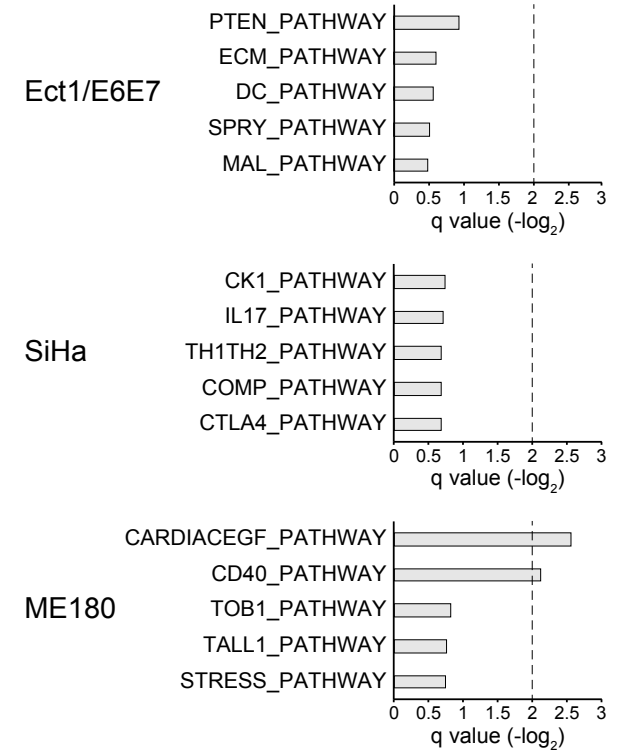

#### Supplementary Figure 4.

**No common overrepresented pathway was present among the *FGFR3-TACC3* KD fusion group.**

**(a)** Venn diagram shows no common overrepresented pathway among *FGFR3-TACC3* kinase dead domain (KD) fusion-transfected Ect1/E6E7, SiHa, and ME180 cell lines.

**(b)** Five top-ranked overrepresented pathways based on GSEA between the *FGFR3-TACC3* KD fusion group and control group.

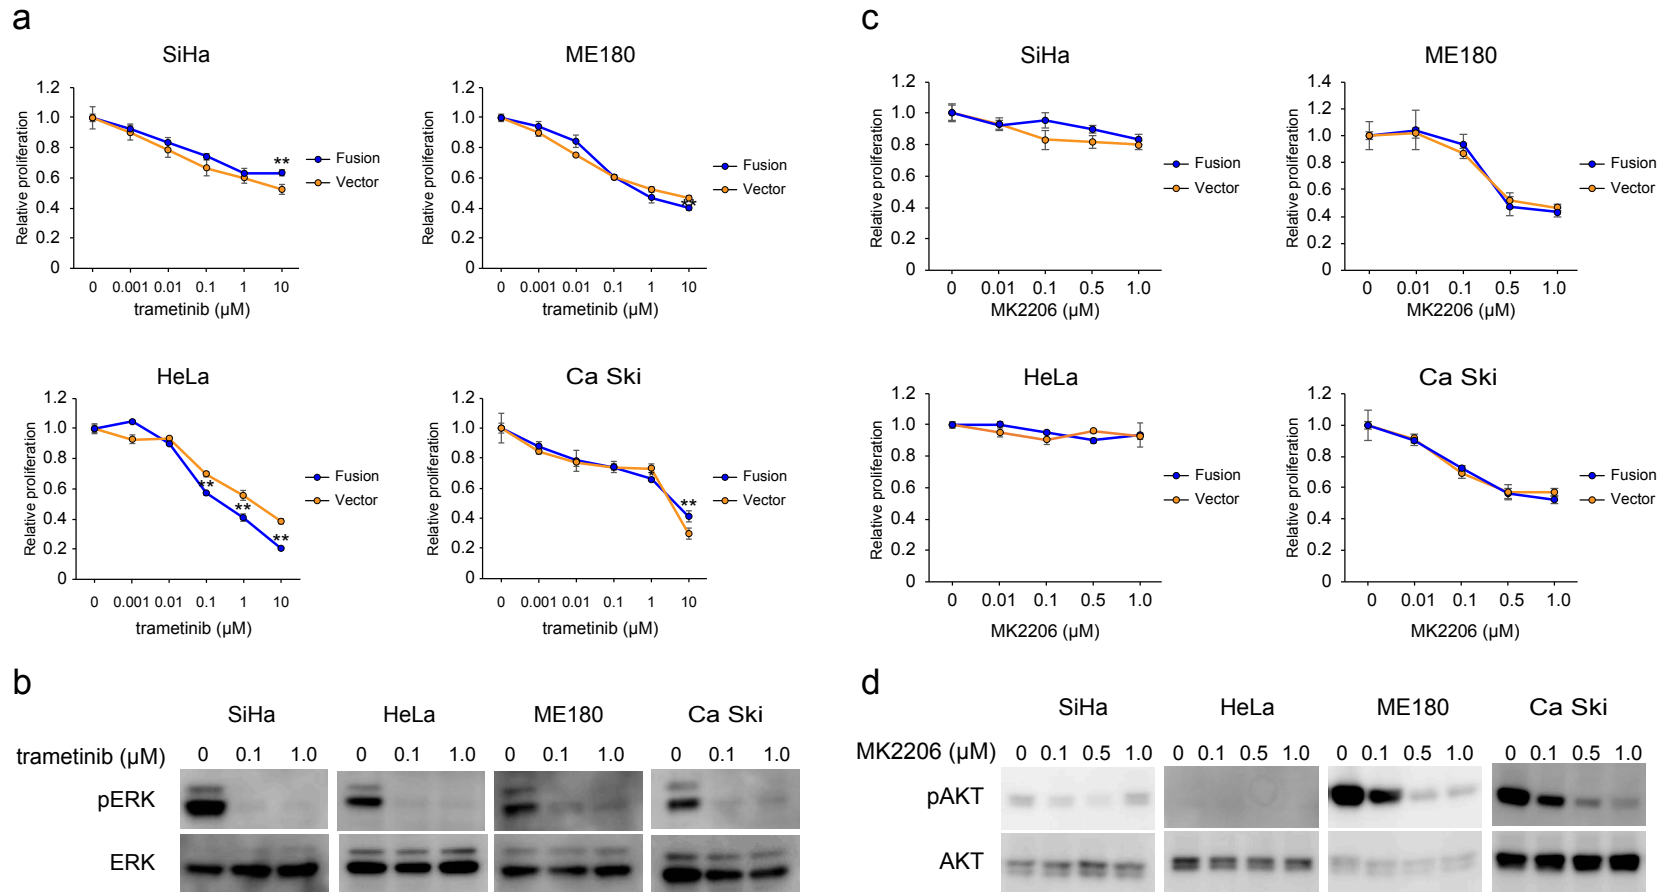

### Supplementary Figure 5.

#### Effectiveness of a MEK inhibitor or AKT inhibitor in *FGFR3-TACC3* fusion-transfected cell lines.

(a, c) Cell proliferation was assessed by the Cell Titer Glo Assay after 72 hours of treatment with a MEK inhibitor (trametinib) or AKT inhibitor (MK2206). Data represent the average and standard deviation of quadruplicate experiments. Relative proliferation at each concentration was tested by unpaired t-test (\*\* denotes  $p < 0.01$ ). (b, d) Western blot analysis of *FGFR3-TACC3* fusion-transfected cell lines (SiHa, HeLa, ME180, and Ca Ski) after 24 hours of treatment with a MEK inhibitor (trametinib) or AKT inhibitor (MK2206).

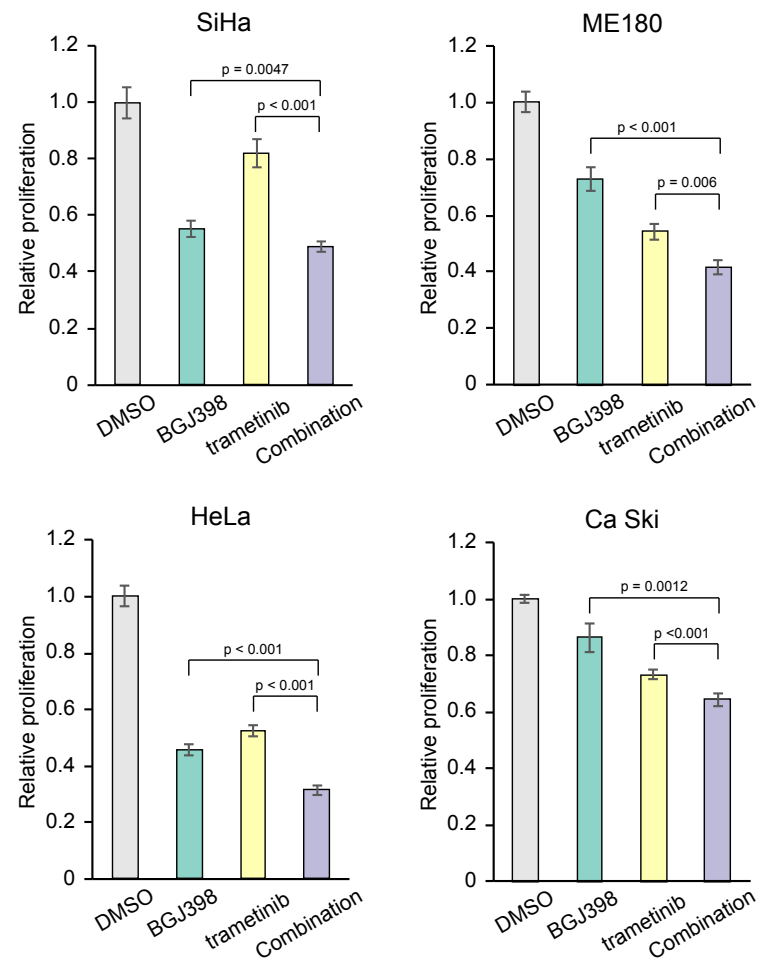

### Supplementary Figure 6.

#### Suppression of cell proliferation of *FGFR3-TACC3* fusion-transfected cell lines after treatment with *FGFR* and/or *MEK* inhibitors.

Cell proliferation was assessed by the Cell Titer Glo Assay after 72 hours of treatment with BGJ398 (0.1  $\mu\text{g/ml}$ ), trametinib (0.1  $\mu\text{g/ml}$ ), or the combination of BGJ398 and trametinib. Bar graph represents the average  $\pm$  standard deviation of quadruplicate experiments.



PIK3CA Exon 9  
c.1633G > A (E545K)

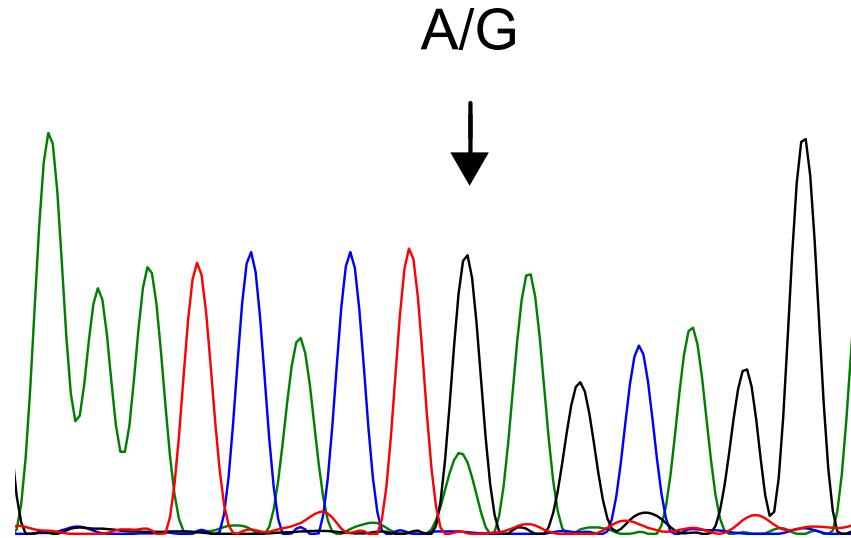

**Supplementary Figure 7.**

**Validation of the *PIK3CA* activation mutation in the “Fusion 1”-positive cervical cancer sample.** Electropherogram from Sanger sequencing of *PIK3CA*. Arrow shows the two overlapping peaks of the mutated site.

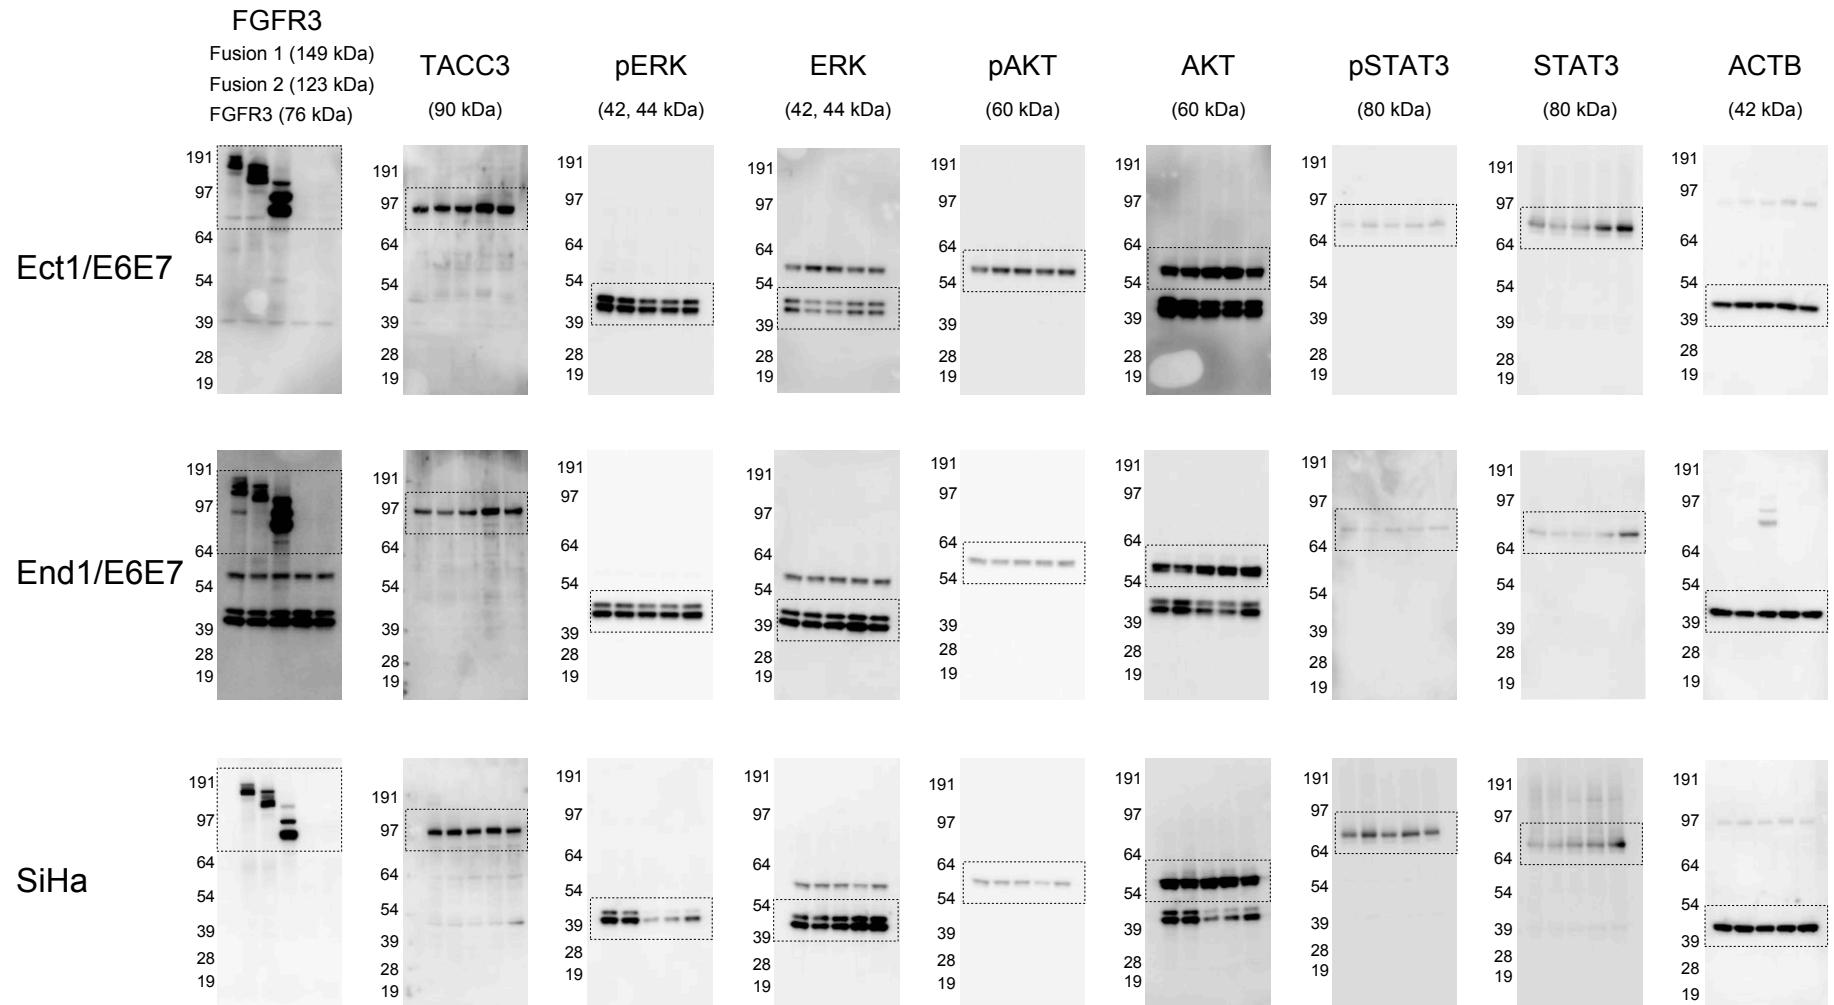

**Supplementary Figure 8.**  
 Full Western blot images used in Figure 2b and 2e

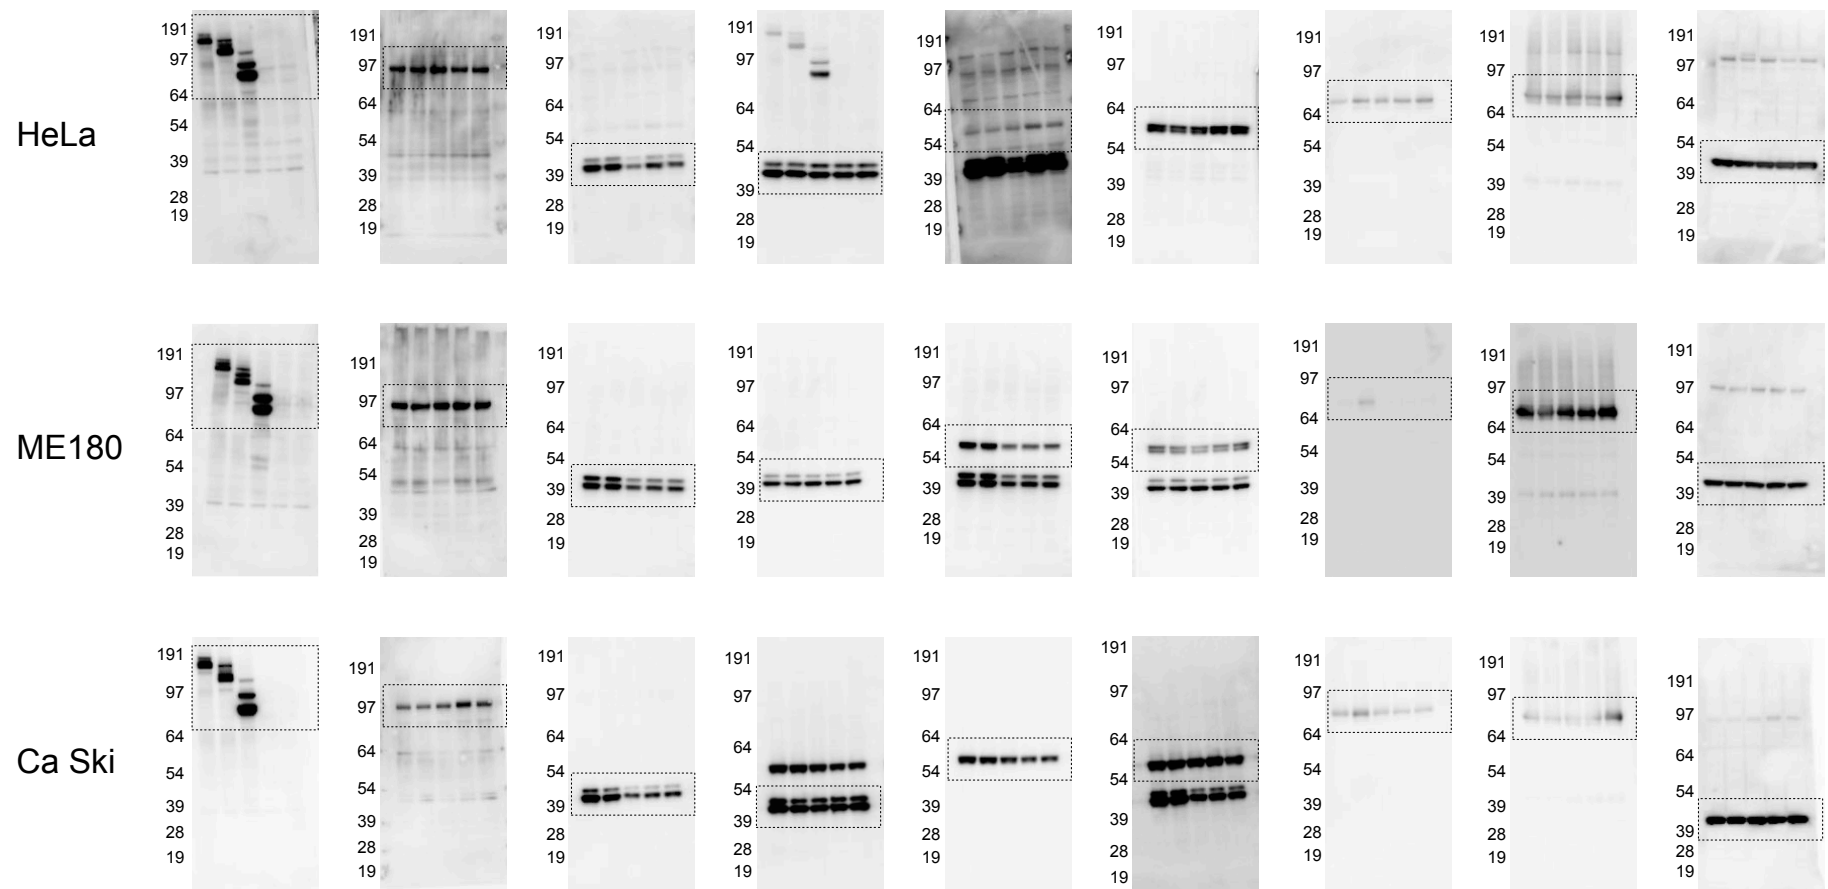

**Supplementary Figure 8. (continued)**

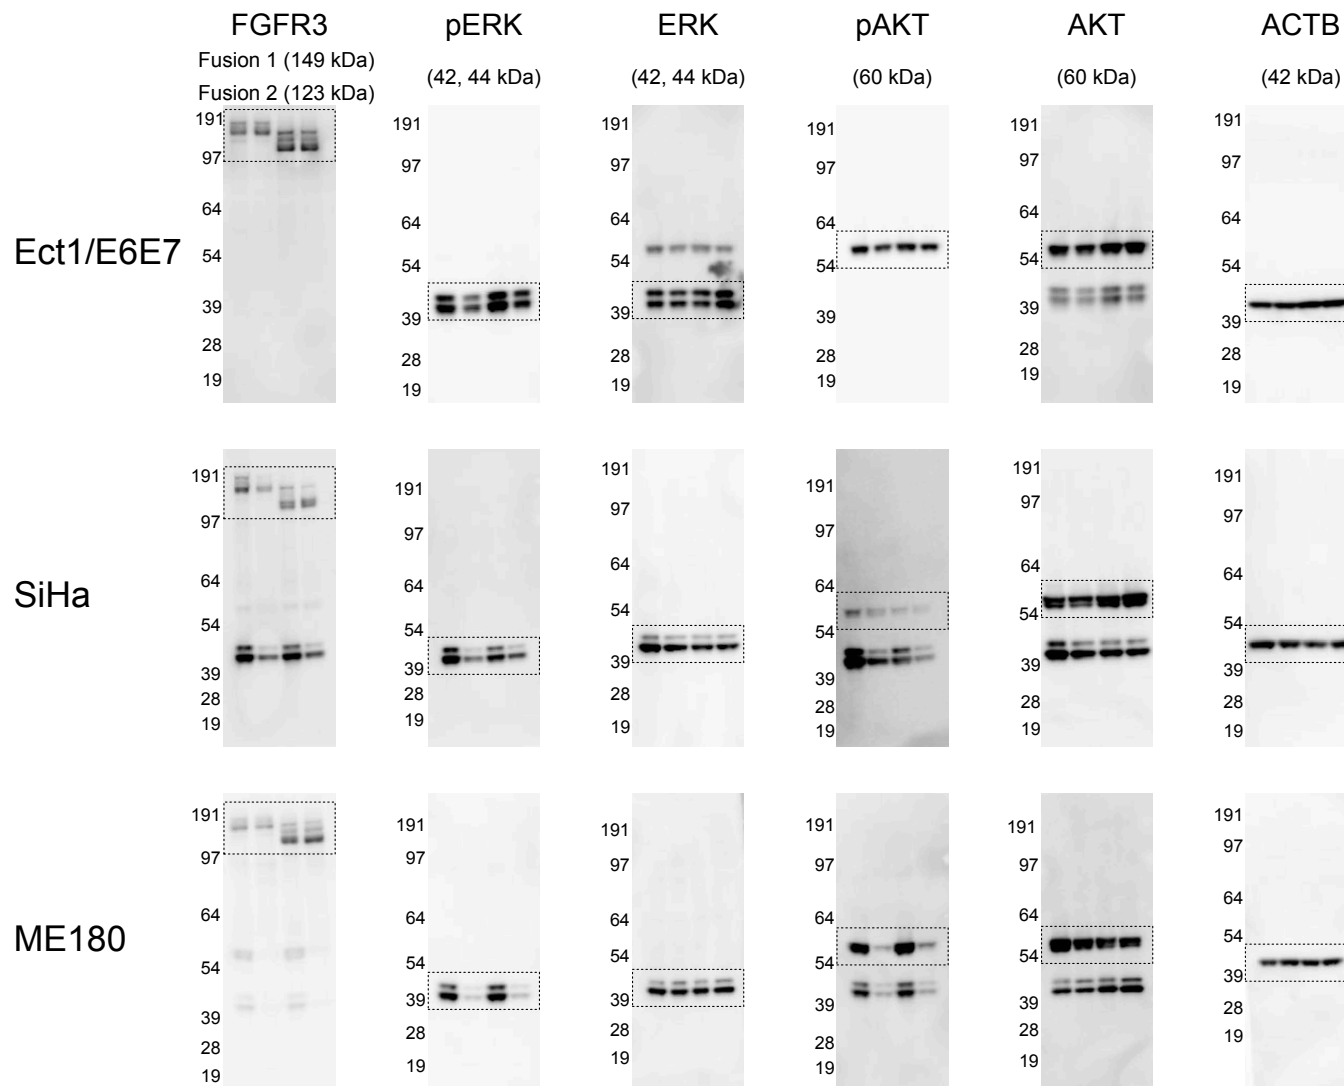

**Supplementary Figure 9.**  
Full Western blot images used in Figure 3a.

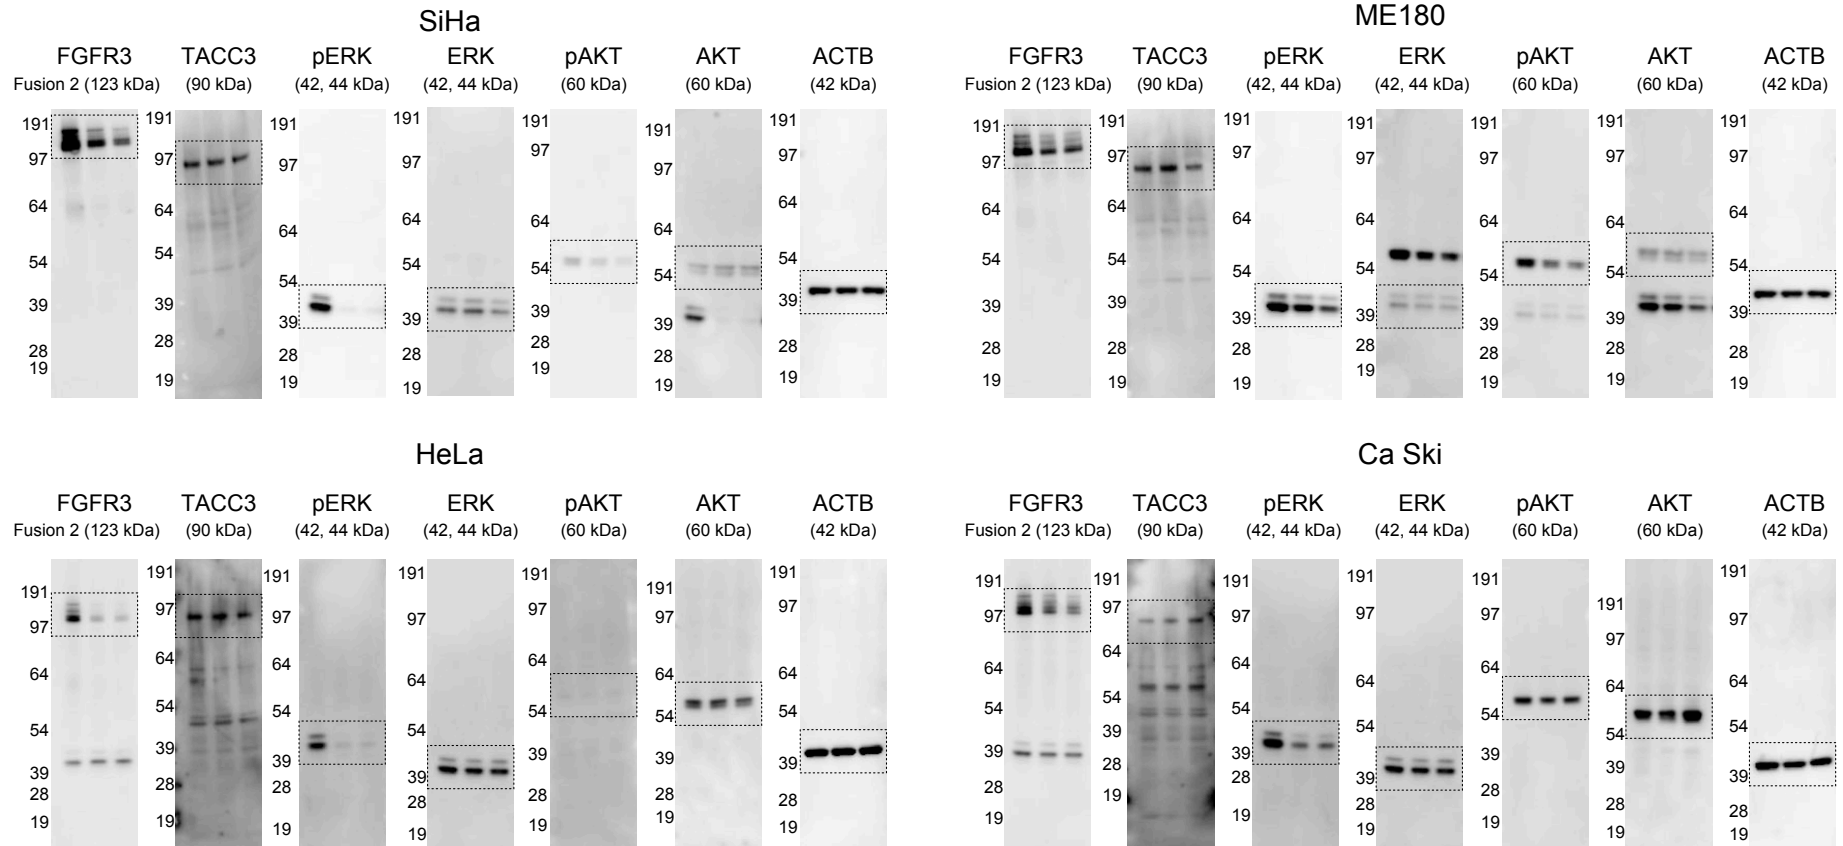

**Supplementary Figure 10.**  
Full Western blot images used in Figure 4c

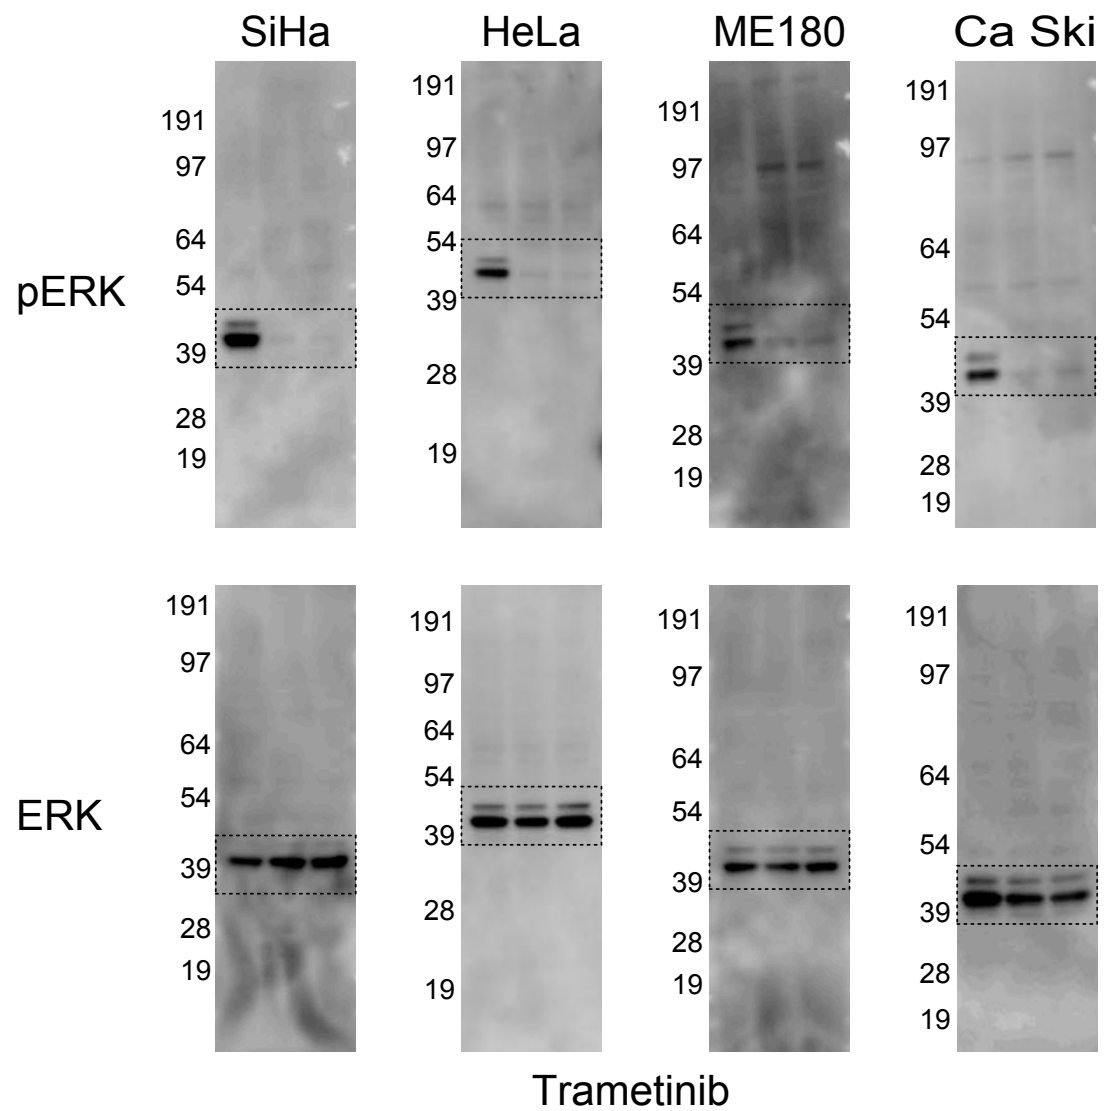

**Supplementary Figure 11.**  
 Full Western blot images used in Supplementary Figure 5b

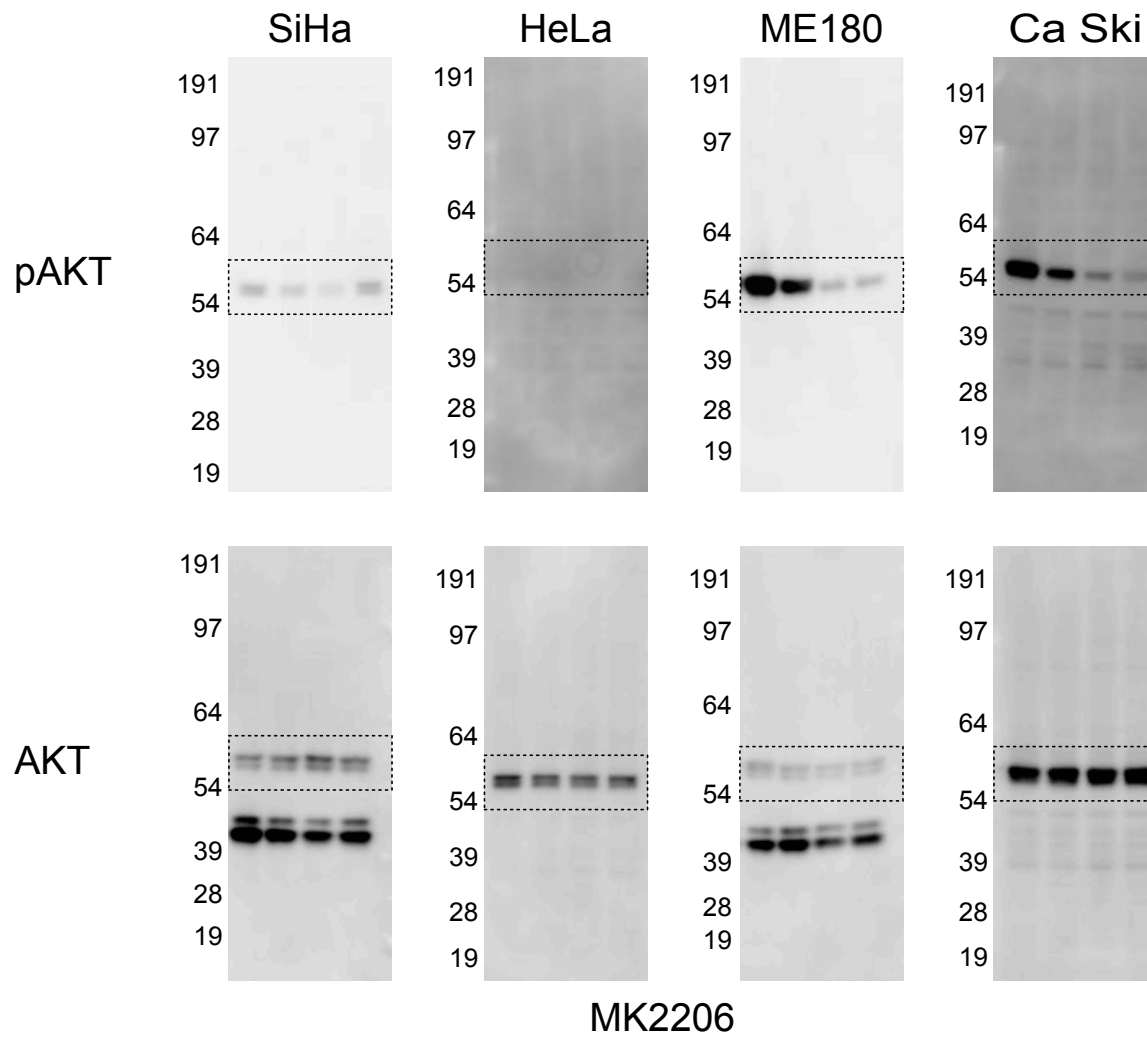

**Supplementary Figure 12.**  
Full Western blot images used in Supplementary Figure 5d

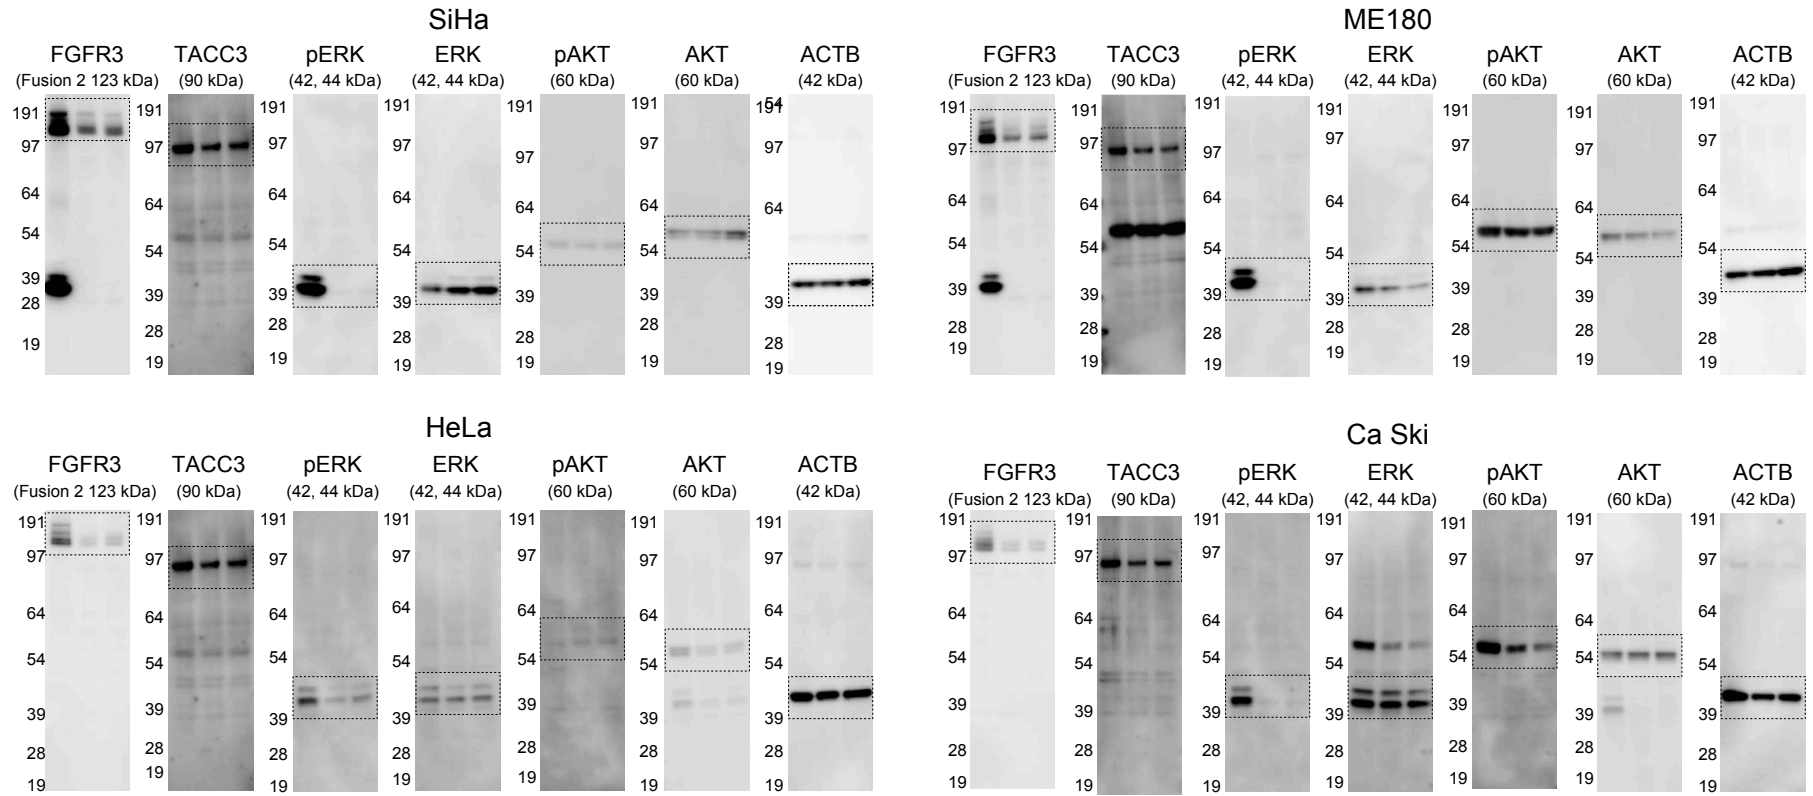

**Supplementary Figure 13.**  
Full Western blot images used in Figure 6a



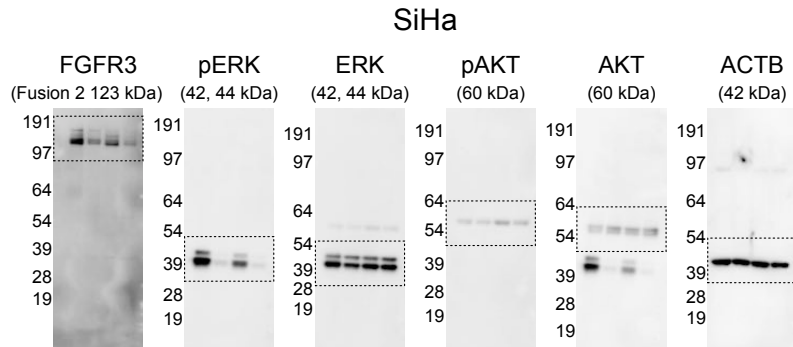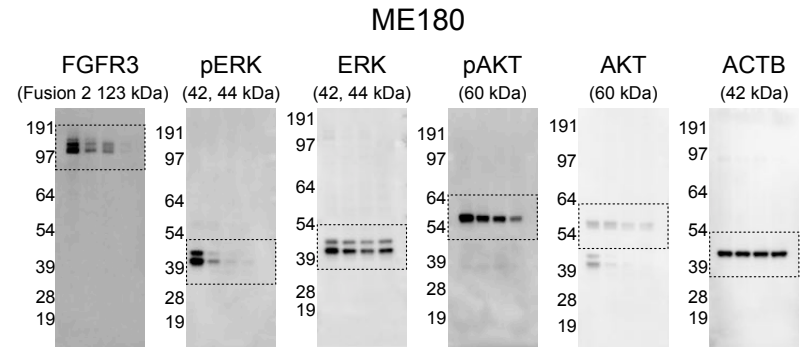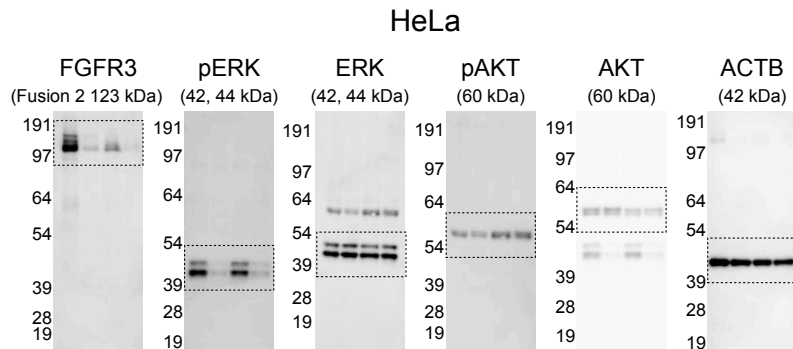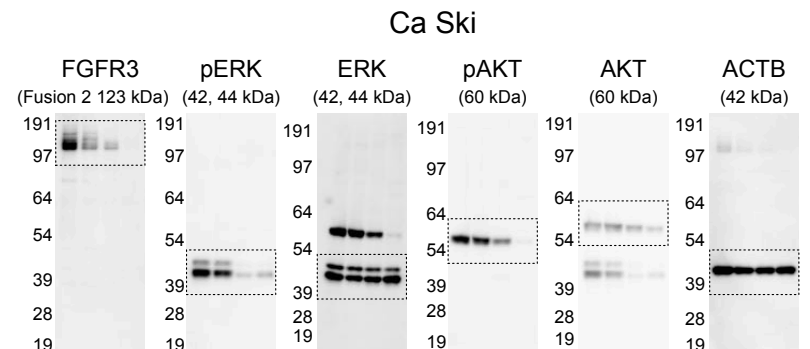

**Supplementary Figure 14.**  
Full Western blot images used in Figure 6c

|                 | Squamous cell carcinoma | Adenocarcinoma | p -value |
|-----------------|-------------------------|----------------|----------|
| Lung Cancer     | 1.0 % (5/502)           | 0 % (0/541)    | 0.026    |
| Cervical Cancer | 1.6 % (4/253)           | 0 % (0/47)     | 0.60     |

**Supplementary Table 1.**

**Different frequency of *FGFR3-TACC3* fusion events between squamous cell carcinoma and adenocarcinoma in the TCGA lung and cervical cancer datasets**

|                 | SiHa     | HeLa     | ME180        | Ca Ski   | Role in cancer |
|-----------------|----------|----------|--------------|----------|----------------|
| <i>PIK3CA</i>   | wild     | wild     | p.E545K      | p.E545K  | Oncogene       |
| <i>INSM2</i>    | wild     | wild     | p.P1855fs*21 | p.Q4079* | NA             |
| <i>KMT2D</i>    | wild     | wild     | p.P1585fs*21 | p.Q3809* | NA             |
| <i>MLL2</i>     | wild     | wild     | p.T56N       | p.A304E  | NA             |
| <i>RYR1</i>     | wild     | wild     | p.R777H      | p.E813G  | NA             |
| <i>WDR27</i>    | wild     | wild     | p.T1155I     | p.V895L  | NA             |
| <i>BAZ2A</i>    | p.C1073R | p.K714N  | wild         | wild     | NA             |
| <i>CRB1</i>     | p.L1316S | p.P876L  | wild         | wild     | NA             |
| <i>TRAPPC10</i> | p.F223L  | p.H1171R | wild         | wild     | NA             |
| <i>VPS13C</i>   | p.H131R  | p.D1639H | wild         | wild     | NA             |

NA ; Not Applicable

**Supplementary Table 2.**

**Genetic background of four cervical cancer cell lines based on the COSMIC database**

| SampleID               | Gene A       | Gene B       | Discordant read pairs | Junction spanning reads | Junction                        |
|------------------------|--------------|--------------|-----------------------|-------------------------|---------------------------------|
| SiHa fusion 2_1        | <i>FGFR3</i> | <i>TACC3</i> | 324                   | 866                     | FGFR3:4:1806661_TACC3:4:1732899 |
| SiHa fusion 2_2        | <i>FGFR3</i> | <i>TACC3</i> | 349                   | 875                     | FGFR3:4:1806661_TACC3:4:1732899 |
| SiHa fusion 2_3        | <i>FGFR3</i> | <i>TACC3</i> | 280                   | 776                     | FGFR3:4:1806661_TACC3:4:1732899 |
| SiHa fusion 2KD_1      | <i>FGFR3</i> | <i>TACC3</i> | 215                   | 464                     | FGFR3:4:1806661_TACC3:4:1732899 |
| SiHa fusion 2KD_2      | <i>FGFR3</i> | <i>TACC3</i> | 197                   | 449                     | FGFR3:4:1806661_TACC3:4:1732899 |
| SiHa fusion 2KD_3      | <i>FGFR3</i> | <i>TACC3</i> | 151                   | 300                     | FGFR3:4:1806661_TACC3:4:1732899 |
| ME180 fusion 2_1       | <i>FGFR3</i> | <i>TACC3</i> | 183                   | 342                     | FGFR3:4:1806661_TACC3:4:1732899 |
| ME180 fusion 2_2       | <i>FGFR3</i> | <i>TACC3</i> | 162                   | 276                     | FGFR3:4:1806661_TACC3:4:1732899 |
| ME180 fusion 2_3       | <i>FGFR3</i> | <i>TACC3</i> | 246                   | 550                     | FGFR3:4:1806661_TACC3:4:1732899 |
| ME180 fusion 2KD_1     | <i>FGFR3</i> | <i>TACC3</i> | 135                   | 441                     | FGFR3:4:1806661_TACC3:4:1732899 |
| ME180 fusion 2KD_2     | <i>FGFR3</i> | <i>TACC3</i> | 158                   | 452                     | FGFR3:4:1806661_TACC3:4:1732899 |
| ME180 fusion 2KD_3     | <i>FGFR3</i> | <i>TACC3</i> | 176                   | 462                     | FGFR3:4:1806661_TACC3:4:1732899 |
| Ect1/E6E7 fusion 2_1   | <i>FGFR3</i> | <i>TACC3</i> | 227                   | 800                     | FGFR3:4:1806661_TACC3:4:1732899 |
| Ect1/E6E7 fusion 2_2   | <i>FGFR3</i> | <i>TACC3</i> | 242                   | 721                     | FGFR3:4:1806661_TACC3:4:1732899 |
| Ect1/E6E7 fusion 2_3   | <i>FGFR3</i> | <i>TACC3</i> | 187                   | 519                     | FGFR3:4:1806661_TACC3:4:1732899 |
| Ect1/E6E7 fusion 2KD_1 | <i>FGFR3</i> | <i>TACC3</i> | 119                   | 398                     | FGFR3:4:1806661_TACC3:4:1732899 |
| Ect1/E6E7 fusion 2KD_2 | <i>FGFR3</i> | <i>TACC3</i> | 132                   | 388                     | FGFR3:4:1806661_TACC3:4:1732899 |
| Ect1/E6E7 fusion 2KD_3 | <i>FGFR3</i> | <i>TACC3</i> | 122                   | 431                     | FGFR3:4:1806661_TACC3:4:1732899 |

**Supplementary Table 3.**  
**Expression of fusion transcripts in *FGFR3-TACC3* -fusion-transfected or fusion kinase-dead (KD)-transfected cell lines, by PRADA analysis**

| Cell line | Pathway name              | NES  | FDR q-value (-log <sub>2</sub> ) |
|-----------|---------------------------|------|----------------------------------|
| Ect1/E6E7 | BIOCARTA_STEM_PATHWAY     | 1.55 | 4.47                             |
| Ect1/E6E7 | BIOCARTA_INFLAM_PATHWAY   | 1.50 | 4.47                             |
| Ect1/E6E7 | BIOCARTA_CYTOKINE_PATHWAY | 1.44 | 2.35                             |
| Ect1/E6E7 | BIOCARTA_NTHI_PATHWAY     | 1.41 | 2.17                             |
| SiHa      | BIOCARTA_INFLAM_PATHWAY   | 1.50 | 4.54                             |
| SiHa      | BIOCARTA_ERYTH_PATHWAY    | 1.44 | 3.43                             |
| SiHa      | BIOCARTA_SPRY_PATHWAY     | 1.34 | 2.29                             |
| ME180     | BIOCARTA_ERYTH_PATHWAY    | 1.49 | 3.23                             |
| ME180     | BIOCARTA_SPRY_PATHWAY     | 1.50 | 3.12                             |
| ME180     | BIOCARTA_INFLAM_PATHWAY   | 1.46 | 3.05                             |
| ME180     | BIOCARTA_NKT_PATHWAY      | 1.50 | 2.99                             |
| ME180     | BIOCARTA_TH1TH2_PATHWAY   | 1.54 | 2.83                             |
| ME180     | BIOCARTA_TNFR2_PATHWAY    | 1.40 | 2.70                             |
| ME180     | BIOCARTA_NTHI_PATHWAY     | 1.39 | 2.62                             |
| ME180     | BIOCARTA_LAIR_PATHWAY     | 1.54 | 2.61                             |
| ME180     | BIOCARTA_CD40_PATHWAY     | 1.40 | 2.60                             |
| ME180     | BIOCARTA_41BB_PATHWAY     | 1.56 | 2.59                             |
| ME180     | BIOCARTA_TEL_PATHWAY      | 1.38 | 2.52                             |
| ME180     | BIOCARTA_IL17_PATHWAY     | 1.38 | 2.48                             |
| ME180     | BIOCARTA_STEM_PATHWAY     | 1.54 | 2.31                             |
| ME180     | BIOCARTA_CYTOKINE_PATHWAY | 1.57 | 2.20                             |
| ME180     | BIOCARTA_HSP27_PATHWAY    | 1.32 | 2.19                             |
| ME180     | BIOCARTA_NFKB_PATHWAY     | 1.33 | 2.15                             |
| ME180     | BIOCARTA_IL12_PATHWAY     | 1.32 | 2.12                             |
| ME180     | BIOCARTA_IGF1_PATHWAY     | 1.30 | 2.01                             |

**Supplementary Table 4.**

**Normalized enrichment score (NES) and q-value for each significantly overrepresented pathway in *FGFR3-TACC3* fusion-transfected cell lines**

Single nucleotide variants of PI3K/AKT pathway in *FGFR3-TACC3* fusion-positive cervical cancer

|               | Fusion 1 | Fusion 2 | TCGA-DS-A3LQ | TCGA-WL-A834 | TCGA-VS-A9UD | TCGA-ZJ-AAXT |
|---------------|----------|----------|--------------|--------------|--------------|--------------|
| <i>PIK3CA</i> | p.E545K  | wild     | wild         | wild         | NA           | NA           |

NA ; Not available

Copy number alterations of PI3K/AKT pathway in *FGFR3-TACC3* fusion-positive cervical cancer

|               | Fusion 1 | Fusion 2 | TCGA-DS-A3LQ | TCGA-WL-A834 | TCGA-VS-A9UD | TCGA-ZJ-AAXT |
|---------------|----------|----------|--------------|--------------|--------------|--------------|
| <i>PIK3CA</i> | amp      | amp      | neutral      | neutral      | neutral      | neutral      |
| <i>AKT2</i>   | neutral  | neutral  | neutral      | amp          | neutral      | amp          |
| <i>RICTOR</i> | neutral  | amp      | neutral      | amp          | neutral      | neutral      |
| <i>PIK3R1</i> | amp      | deletion | neutral      | neutral      | neutral      | neutral      |
| <i>PDPK1</i>  | amp      | neutral  | neutral      | neutral      | neutral      | neutral      |
| <i>FOXO3</i>  | amp      | neutral  | neutral      | neutral      | neutral      | neutral      |
| <i>MLST8</i>  | amp      | neutral  | neutral      | neutral      | neutral      | neutral      |

amp ; amplification

**Supplementary Table 5.**  
**Oncogenic alterations in the PI3K-AKT pathway in *FGFR3-TACC3* fusion-positive cancer.**

|                         | <b>TCGA dataset (N = 306)</b> | <b>Japanese dataset (N = 103)</b> |
|-------------------------|-------------------------------|-----------------------------------|
| <b>Median Age</b>       | 46 (20-88)                    | 46 (23-47)                        |
| <b>Histology</b>        |                               |                                   |
| Squamous cell carcinoma | 253 (82.7 %)                  | 66 (64.1 %)                       |
| Adenocarcinoma          | 47 (15.4 %)                   | 29 (28.2 %)                       |
| Adenosquamous carcinoma | 6 (1.9 %)                     | 6 (5.8 %)                         |
| Others                  | 0 (0 %)                       | 2 (1.9 %)                         |
| <b>Stage (FIGO)</b>     |                               |                                   |
| I                       | 163 (53.2 %)                  | 75 (72.8 %)                       |
| II                      | 70 (22.9 %)                   | 25 (24.3 %)                       |
| III                     | 45 (14.7 %)                   | 1 (1.0 %)                         |
| IV                      | 21 (6.9 %)                    | 2 (1.9 %)                         |
| NA                      | 7 (2.3 %)                     | 0 (0 %)                           |

**Supplementary Table 6.**  
**Clinicopathological characteristics of the two cervical cancer datasets used in this study**

| Target                                                                         | Forward primer (5' to 3' )     | Reverse primer (3' to 5' )     |
|--------------------------------------------------------------------------------|--------------------------------|--------------------------------|
| <i>FGFR3-TACC3</i> screening<br><i>FGFR3</i> (exon 17)- <i>TACC3</i> (exon 16) | GACCTGGACCGTGTCTTAC            | CCGTGGAGGTCAGATCTTCT           |
| Fusion 1<br><i>FGFR3</i> (exon 17)- <i>TACC3</i> (exon 4)                      | GACCTGGACCGTGTCTTAC            | AAGGGTCTGAGTGCCATCTG           |
| Fusion 2<br><i>FGFR3</i> (exon 17)- <i>TACC3</i> (exon 7)                      | GACCTGGACCGTGTCTTAC            | GGAAGTTCCAAACTGCTCCA           |
| <i>FGFR3</i> (fusion + wild-type)                                              | GACGTGCACAACCTCGACTA           | CCAAAGGACCAGACGTCCT            |
| <i>TACC3</i> (fusion + wild-type)                                              | AGCCTGAGGAAGGAGCAGA            | GAGATGAGGTCGTCGCAGAT           |
| <i>ACTB</i>                                                                    | TGGCACCCAGCACAAATGAA           | CTAAGTCATAGTCCGCCTAGAAGCA      |
| <i>CSF3</i>                                                                    | CCACCTACAAGCTGTGCCA            | CCTGGTAGAGGAAAAGGCCG           |
| <i>IL1A</i>                                                                    | CTGATGATGACCTGGAGGCC           | TGAGGGCGTCATTCAGGATG           |
| <i>IL6</i>                                                                     | GGTACATCCTCGACGGCATC           | GGTTGTTTTCTGCCAGTGCC           |
| <i>IL8</i>                                                                     | CTCCAAACCTTTCCACCCCA           | TTCCTTGGGGTCCAGACAGA           |
| <i>IL11</i>                                                                    | TCGAGTTTCCCAGACCCTC            | GGCAGGGAATCCAGGTTGTG           |
| <i>IL12A</i>                                                                   | ACTCCCAAACCTGCTGAGG            | TGGTAAACAGGCCTCCACTG           |
| <i>PIK3CA</i> (exon 9)                                                         | TCATCTGTGAATCCAGAGGGG          | AGCACTTACCTGTGACTCCA           |
| <i>FGFR3</i> K508M (Mutagenesis)                                               | GCCGTGATGATGCTGAAAGACGATGCCACT | CAGCATCATCACGGCTACGGTGACAGGCTT |

**Supplementary Table 7.**  
**Details of primers used in this study**
